# Supplementary material for: Regression of Intracranial Meningiomas Following Treatment with Cabozantinib
Source: MDPI journal article supplement (doi:10.3390/curroncol28020145), 2021-04-18
Supplement: s1 [file s1]

# Regression of Intracranial Meningiomas Following Treatment with Cabozantinib

Rupesh Kotecha, Raees Tonse, Haley Appel, Yazmin Odia, Ritesh R. Kotecha, Guilherme Rabinowits and Minesh P. Mehta

**Table S1.** Ongoing trials of VEGF agents in meningioma patients.

| Trial Registration Number | Regimen              | Mechanism of Action                        | Study Design | Number of Patients | WHO Grade Inclusion | Primary End Point* | Estimated Primary Completion Date |
|---------------------------|----------------------|--------------------------------------------|--------------|--------------------|---------------------|--------------------|-----------------------------------|
| NCT01125046               | Bevacizumab          | Anti-VEGF antibody                         | Phase II     | 50                 | I/II/III            | PFS - 6 Months     | Jul-19                            |
| NCT02847559               | Bevacizumab + Optune | Anti-VEGF antibody, Electric Field therapy | Phase II     | 27                 | II/III              | PFS - 6 Months     | Sep-21                            |
| NCT03279692               | Pembrolizumab        | PD-1 inhibitor                             | Phase II     | 26                 | II/III              | PFS - 6 Months     | Sep-25                            |

\* 6-month progression-free survival.

**Table S2.** – Select clinical studies evaluating Cabozantinib in patients with primary or metastatic CNS tumors.

| Author and year                      | Regimen      | Study Design | Number of Patients | Diagnosis              |
|--------------------------------------|--------------|--------------|--------------------|------------------------|
| Wen et al., 2017 <sup>17</sup>       | Cabozantinib | Phase II     | 152                | Recurrent Glioblastoma |
| Cloughesy et al., 2018 <sup>16</sup> | Cabozantinib | Phase II     | 222                | Recurrent Glioblastoma |
